# Supplementary material for: Anorexia-Induced Hypoleptinemia Drives Adaptations in the JAK2/STAT3 Pathway in the Ventral and Dorsal Hippocampus of Female Rats
Source: MDPI journal article supplement (doi:10.3390/nu16081171), 2024-04-15
Supplement: s1 [file s1]

**Supplementary figure S2. A** Example of full-size cropped immunoblots related to the expression levels of LepR (150 kDa) and  $\beta$ -actin (43 kDa) measured in the whole post-synaptic density of the ventral Hippocampus of CTRL, FR, EXE and ABA rats after the recovery phase of the anorexic phenotype (PND 49); **B** Example of full-size cropped immunoblots related to the expression levels of pJAK2 (125 kDa), JAK2 (125 kDa), pSTAT3 (86 kDa), STAT3 (86 kDa) and  $\beta$ -actin (43 kDa) measured in the cytosolic fraction of the ventral Hippocampus of CTRL, FR, EXE and ABA rats after the recovery phase of the anorexic phenotype (PND 49); **C** Example of full-size cropped immunoblots related to the expression levels of STAT3 (86 kDa) and  $\beta$ -actin (43 kDa) measured in the nuclear fraction of the ventral Hippocampus of CTRL, FR, EXE and ABA rats after the recovery phase of the anorexic phenotype (PND 49). 1= controls, CTRL; 2= food restricted, FR; 3= exercise, EXE; 4= activity-based anorexia, ABA.

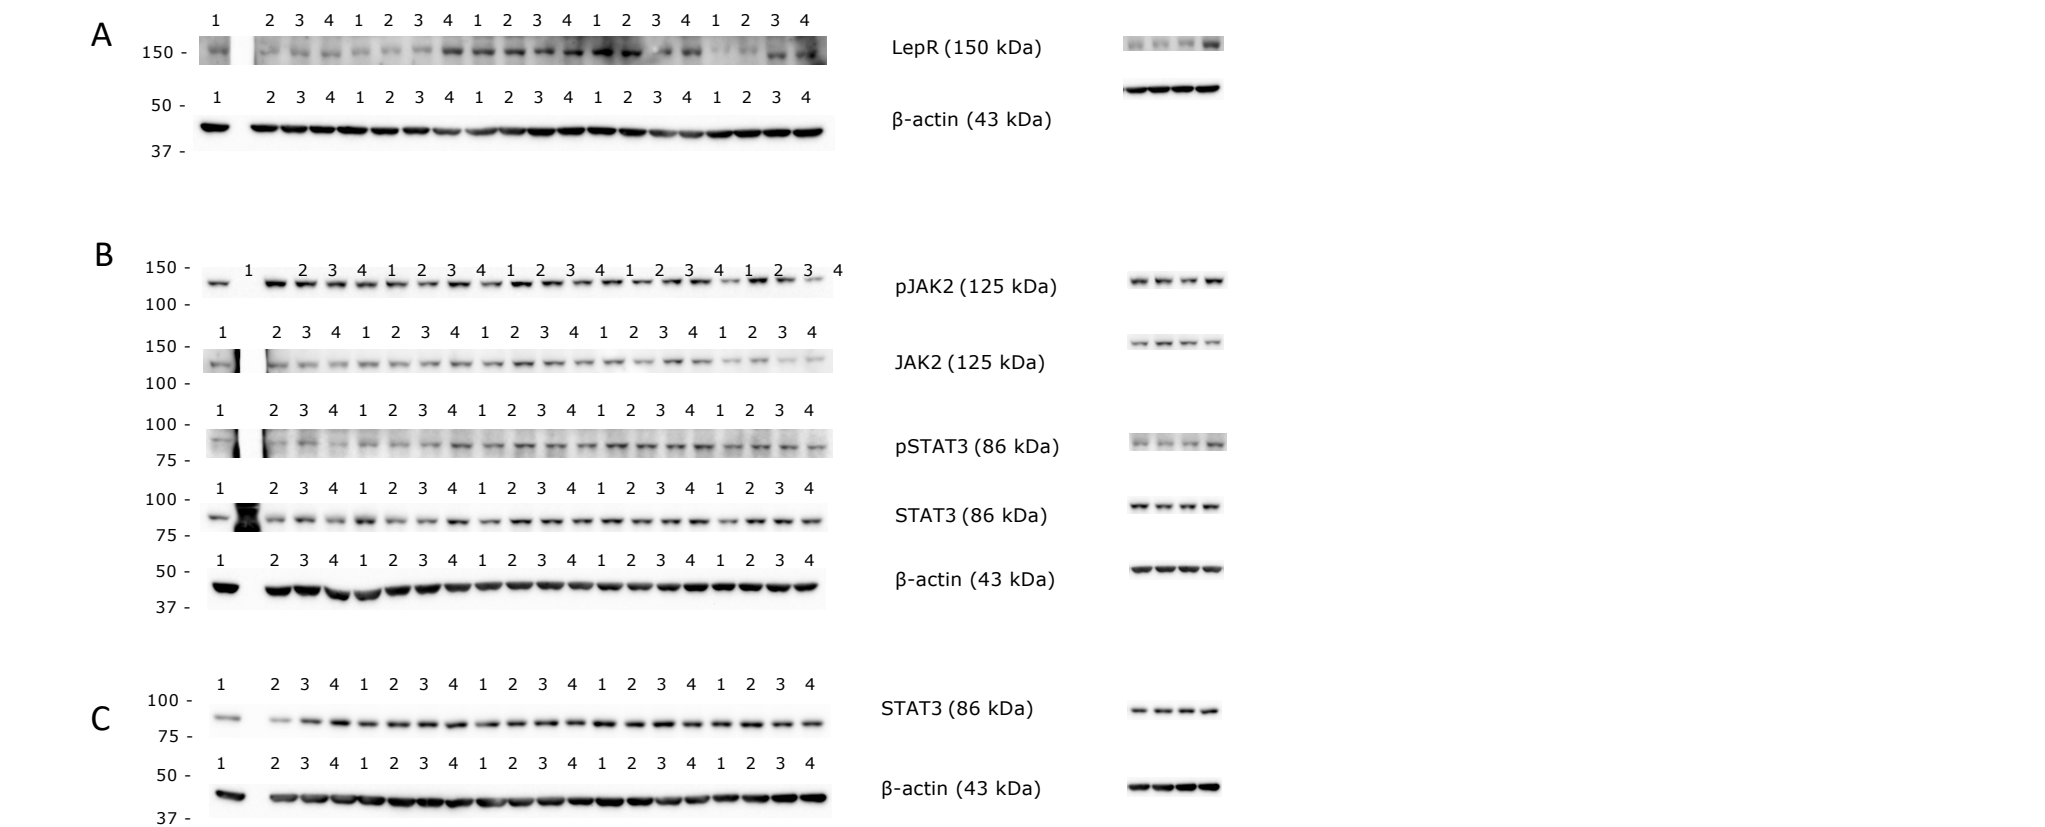

**Supplementary figure S3. A** Example of full-size cropped immunoblots related to the expression levels of LepR (150 kDa) and  $\beta$ -actin (43 kDa) measured in the whole post-synaptic density of the dorsal Hippocampus of CTRL, FR, EXE and ABA rats in the acute phase of the anorexic phenotype (PND 42); **B** Example of full-size cropped immunoblots related to the expression levels of pJAK2 (125 kDa), JAK2 (125 kDa), pSTAT3 (86 kDa), STAT3 (86 kDa) and  $\beta$ -actin (43 kDa) measured in the cytosolic fraction of the dorsal Hippocampus of CTRL, FR, EXE and ABA rats in the acute phase of the anorexic phenotype (PND42); **C** Example of full-size cropped immunoblots related to the expression levels of STAT3 (86 kDa) and  $\beta$ -actin (43 kDa) measured in the nuclear fraction of the dorsal Hippocampus of CTRL, FR, EXE and ABA rats in the acute phase of the anorexic phenotype (PND42). 1= controls, CTRL; 2= food restricted, FR; 3= exercise, EXE; 4= activity-based anorexia, ABA.

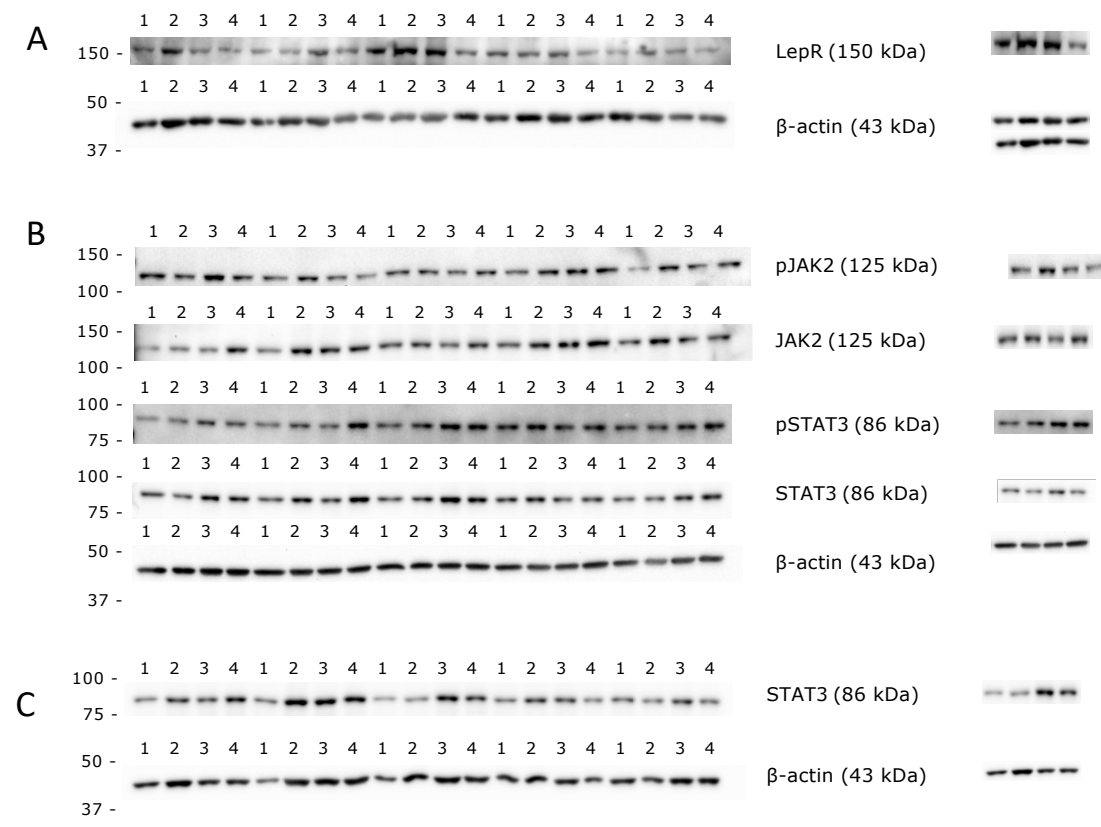

**Supplementary figure S4. A** Example of full-size cropped immunoblots related to the expression levels of LepR (150 kDa) and  $\beta$ -actin (43 kDa) measured in the whole post-synaptic density of the dorsal Hippocampus of CTRL, FR, EXE and ABA rats after the recovery phase of the anorexic phenotype (PND 49); **B** Example of full-size cropped immunoblots related to the expression levels of pJAK2 (125 kDa), JAK2 (125 kDa), pSTAT3 (86 kDa), STAT3 (86 kDa) and  $\beta$ -actin (43 kDa) measured in the cytosolic fraction of the dorsal Hippocampus of CTRL, FR, EXE and ABA rats after the recovery phase of the anorexic phenotype (PND 49); **C** Example of full-size cropped immunoblots related to the expression levels of STAT3 (86 kDa) and  $\beta$ -actin (43 kDa) measured in the nuclear fraction of the dorsal Hippocampus of CTRL, FR, EXE and ABA rats after the recovery phase of the anorexic phenotype (PND 49). 1= controls, CTRL; 2= food restricted, FR; 3= exercise, EXE; 4= activity-based anorexia, ABA.

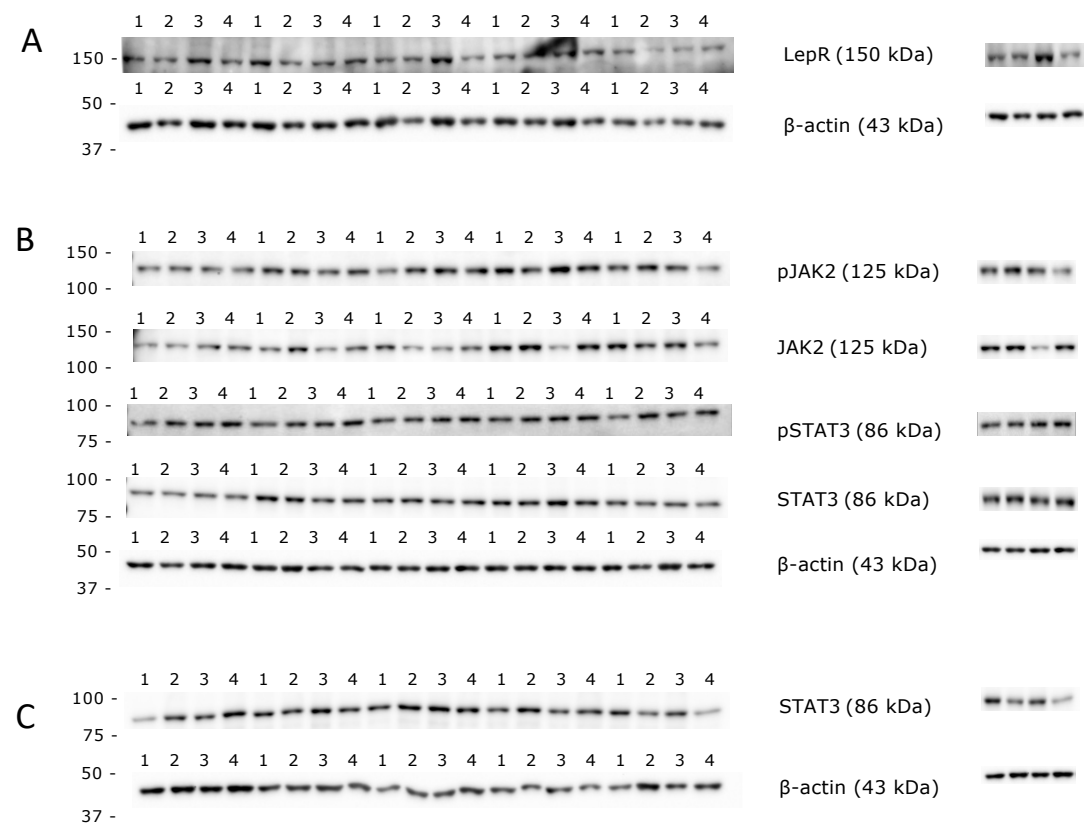

**Supplementary Table S1.** Two-way ANOVA analysis of leptin plasma levels (pg/ml) (A) in the acute phase of the phenotype (PND42) and (B) after a 7-day recovery period (PND49)

|          |                             |                                      |         |
|----------|-----------------------------|--------------------------------------|---------|
| <b>A</b> | <b>Leptin plasma levels</b> | <b>Two-way ANOVA</b>                 |         |
|          |                             | (followed by Tuckey's post hoc test) |         |
|          | <b>Acute phase</b>          | F value                              | p value |
|          | Interaction                 | F (1, 16) = 7,716                    | 0,0134  |
|          | Exercise                    | F (1, 16) = 11,31                    | 0,0040  |
|          | Food restriction            | F (1, 16) = 51,56                    | <0,0001 |
| <b>B</b> | <b>Leptin plasma levels</b> | <b>Two-way ANOVA</b>                 |         |
|          |                             | (followed by Tuckey's post hoc test) |         |
|          | <b>After recovery</b>       | F value                              | p value |
|          | Interaction                 | F (1, 16) = 6,448                    | 0,0219  |
|          | Food restriction            | F (1, 16) = 28,47                    | <0,0001 |

**Supplementary Table S2.** Table 1 Expression and phosphorylation levels of JAK2/STAT3 measured in the cytosolic (A) and (B) nuclear fraction of the ventral Hippocampus of CTRL, FR, EXE and ABA rats in the acute phase of the phenotype induction (left) and after a period of body weight recovery (right). Data are presented as the mean  $\pm$  SEM.

\*p<0.05, \*\*p<0.01. \*\*\*p<0.001 vs. CTRL, #p<0.05, ##p<0.01, ###p<0.001 vs. FR, \$p<0.05, \$\$p<0.01 vs. EXE. (Two-way ANOVA followed by Tukey’s multiple comparisons test).

CTRL: controls (n=5/time point); FR: food restricted (n=5/time point); EXE: exercise (n=5/time point); ABA: activity-based anorexia (n=5/time point)

| A | Cytosolic fraction | Acute phase |                           |                           |                                   | After weight recovery |              |             |                               |
|---|--------------------|-------------|---------------------------|---------------------------|-----------------------------------|-----------------------|--------------|-------------|-------------------------------|
|   |                    | CTRL        | FR                        | EXE                       | ABA                               | CTRL                  | FR           | EXE         | ABA                           |
|   |                    |             |                           |                           |                                   |                       |              |             |                               |
|   | pJAK2              | 100 $\pm$ 1 | 106 $\pm$ 9               | 117 $\pm$ 3               | 96 $\pm$ 4 <sup>\$</sup>          | 100 $\pm$ 3           | 135 $\pm$ 8  | 133 $\pm$ 7 | 142 $\pm$ 16                  |
|   | JAK2               | 100 $\pm$ 2 | 94 $\pm$ 10               | 92 $\pm$ 4                | 131 $\pm$ 10 <sup>*/##/\$\$</sup> | 100 $\pm$ 3           | 121 $\pm$ 4* | 117 $\pm$ 3 | 94 $\pm$ 7 <sup>##/\$\$</sup> |
|   | pSTAT3             | 100 $\pm$ 2 | 59 $\pm$ 5 <sup>***</sup> | 61 $\pm$ 3 <sup>***</sup> | 75 $\pm$ 4 <sup>**/#</sup>        | 100 $\pm$ 7           | 91 $\pm$ 9   | 94 $\pm$ 4  | 124 $\pm$ 8 <sup>#/5</sup>    |
|   | STAT3              | 100 $\pm$ 5 | 83 $\pm$ 3                | 90 $\pm$ 8                | 115 $\pm$ 10 <sup>#</sup>         | 100 $\pm$ 5           | 103 $\pm$ 4  | 103 $\pm$ 8 | 99 $\pm$ 5                    |

  

| B | Nuclear fraction | Acute phase |            |            |            | After weight recovery |             |             |                                     |
|---|------------------|-------------|------------|------------|------------|-----------------------|-------------|-------------|-------------------------------------|
|   |                  | CTRL        | FR         | EXE        | ABA        | CTRL                  | FR          | EXE         | ABA                                 |
|   |                  |             |            |            |            |                       |             |             |                                     |
|   | STAT3            | 100 $\pm$ 6 | 81 $\pm$ 5 | 80 $\pm$ 3 | 71 $\pm$ 8 | 100 $\pm$ 5           | 105 $\pm$ 6 | 110 $\pm$ 4 | 137 $\pm$ 4 <sup>***/###/\$\$</sup> |

**Supplementary Table S3.** Expression and phosphorylation levels of JAK2/STAT3 measured in the cytosolic (A) and nuclear (B) fraction of the dorsal Hippocampus of CTRL, FR, EXE and ABA rats in the acute phase of the phenotype induction (left) and after a period of body weight recovery (right). Data are presented as the mean± SEM.

\*p<0.05, \*\*p<0.01 vs. CTRL, #p<0.05, ##p<0.01 vs. FR, \$p<0.05, \$\$p<0.01 vs. EXE, @p<0.01 vs. ABA. (Two-way ANOVA followed by Tukey’s multiple comparisons test).

CTRL: controls (n=5/time point); FR: food restricted (n=5/time point); EXE: exercise (n=5/time point); ABA: activity-based anorexia (n=5/time point).

| A | Cytosolic fraction | Acute phase |         |          |                                | After weight recovery |         |         |                         |
|---|--------------------|-------------|---------|----------|--------------------------------|-----------------------|---------|---------|-------------------------|
|   |                    | CTRL        | FR      | EXE      | ABA                            | CTRL                  | FR      | EXE     | ABA                     |
|   |                    |             |         |          |                                |                       |         |         |                         |
|   | pJAK2              | 100 ± 7     | 119 ± 4 | 116 ± 5  | 84 ± 7 <sup>##/\$\$</sup>      | 100 ± 5               | 112 ± 8 | 106 ± 8 | 77 ± 3 <sup>##/\$</sup> |
|   | JAK2               | 100 ± 9     | 113 ± 9 | 103 ± 12 | 132 ± 8                        | 100 ± 9               | 105 ± 8 | 79 ± 11 | 101 ± 3                 |
|   | pSTAT3             | 100 ± 7     | 116 ± 6 | 111 ± 2  | 126 ± 3 <sup>**/###/\$\$</sup> | 100 ± 2               | 109 ± 5 | 104 ± 5 | 107 ± 5                 |
|   | STAT3              | 100 ± 1     | 120 ± 4 | 109 ± 5  | 124 ± 4                        | 100 ± 5               | 97 ± 6  | 100 ± 5 | 98 ± 5                  |

  

| B | Nuclear fraction | Acute phase |        |                          |        | After weight recovery |         |        |                          |
|---|------------------|-------------|--------|--------------------------|--------|-----------------------|---------|--------|--------------------------|
|   |                  | CTRL        | FR     | EXE                      | ABA    | CTRL                  | FR      | EXE    | ABA                      |
|   |                  |             |        |                          |        |                       |         |        |                          |
|   | STAT3            | 100 ± 9     | 97 ± 7 | 136 ± 7 <sup>**/@@</sup> | 99 ± 2 | 100 ± 5               | 103 ± 5 | 98 ± 2 | 79 ± 5 <sup>*/\$\$</sup> |

**Supplementary Table S4.** Detailed F values, degrees of freedom and p values relative to two-way ANOVA analysis of protein levels evaluated in the ventral Hippocampus of CTRL, FR, EXE and ABA rats in the acute phase of the phenotype (A) and after a 7-day recovery period (B) and presented in figure 2 and 3 and table 1.

CTRL: controls; FR: food restricted; EXE: exercise; ABA: activity-based anorexia.

## A

| Ventral Hippocampus<br>Acute phase      |                  | Two-way ANOVA<br>(followed by Tuckey's post hoc test) |         |
|-----------------------------------------|------------------|-------------------------------------------------------|---------|
| <i>Post-synaptic density</i>            |                  | F value                                               | p value |
| <b>Leptin Receptor</b>                  | Interaction      | F (1, 16) = 31,08                                     | <0,0001 |
|                                         | Exercise         | F (1, 16) = 21,37                                     | 0,0003  |
|                                         | Food restriction | F (1, 16) = 8,452                                     | 0,0103  |
| <i>Cytosolic fraction</i>               |                  |                                                       |         |
| <b>pJAK2 (Tyr1007/1008)</b>             | Interaction      | F (1, 16) = 6,817                                     | 0,0189  |
| <b>JAK2</b>                             | Interaction      | F (1, 16) = 9,453                                     | 0,0073  |
|                                         | Food restriction | F (1, 16) = 5,053                                     | 0,0390  |
| <b>pJAK2/JAK2</b>                       | Interaction      | F (1, 16) = 62,91                                     | <0,0001 |
|                                         | Food restriction | F (1, 16) = 21,19                                     | 0,0003  |
| <b>pSTAT3 (Tyr705)</b>                  | Interaction      | F (1, 16) = 54,38                                     | <0,0001 |
|                                         | Exercise         | F (1, 16) = 9,258                                     | 0,0078  |
|                                         | Food restriction | F (1, 16) = 13,10                                     | 0,0023  |
| <b>STAT3</b>                            | Interaction      | F (1, 16) = 8,933                                     | 0,0087  |
| <i>Nuclear fraction</i>                 |                  |                                                       |         |
| <b>STAT3</b>                            | Exercise         | F (1, 16) = 6,813                                     | 0,0189  |
|                                         | Food restriction | F (1, 16) = 5,480                                     | 0,0325  |
| <i>Cytosol to Nucleus translocation</i> |                  |                                                       |         |
| <b>STAT3</b>                            | Interaction      | F (1, 16) = 8,158                                     | 0,0114  |
|                                         | Exercise         | F (1, 16) = 27,26                                     | <0,0001 |
|                                         | Food restriction | F (1, 16) = 11,87                                     | 0,0033  |

## B

| After recovery                          |                  |                   |        |
|-----------------------------------------|------------------|-------------------|--------|
| <i>Post-synaptic density</i>            |                  |                   |        |
| <b>Leptin Receptor</b>                  | Interaction      | F (1, 16) = 5,825 | 0,0282 |
|                                         | Exercise         | F (1, 16) = 5,572 | 0,0313 |
|                                         | Food restriction | F (1, 16) = 6,321 | 0,0230 |
| <i>Cytosolic fraction</i>               |                  |                   |        |
| <b>pJAK2 (Tyr1007/1008)</b>             | Food restriction | F (1, 16) = 5,070 | 0,0387 |
| <b>JAK2</b>                             | Interaction      | F (1, 16) = 24,75 | 0,0001 |
|                                         | Interaction      | F (1, 16) = 4,667 | 0,0463 |
| <b>pJAK2/JAK2</b>                       | Exercise         | F (1, 16) = 19,17 | 0,0005 |
|                                         | Food restriction | F (1, 16) = 15,71 | 0,0011 |
| <b>pSTAT3 (Tyr705)</b>                  | Interaction      | F (1, 16) = 7,102 | 0,0169 |
| <b>pSTAT3/STAT3</b>                     | Interaction      | F (1, 16) = 9,109 | 0,0082 |
| <i>Nuclear fraction</i>                 |                  |                   |        |
| <b>STAT3</b>                            | Interaction      | F (1, 16) = 5,375 | 0,0340 |
|                                         | Exercise         | F (1, 16) = 20,12 | 0,0004 |
|                                         | Food restriction | F (1, 16) = 12,08 | 0,0031 |
| <i>Cytosol to Nucleus translocation</i> |                  |                   |        |
| <b>STAT3</b>                            | Interaction      | F (1, 16) = 5,375 | 0,0340 |
|                                         | Exercise         | F (1, 16) = 20,12 | 0,0004 |
|                                         | Food restriction | F (1, 16) = 12,08 | 0,0031 |



**Supplementary Table S5.** Detailed F values, degrees of freedom and p values relative to two-way ANOVA analysis of mRNA levels evaluated in the ventral Hippocampus of CTRL, FR, EXE and ABA rats in the acute phase of the phenotype (A) and after a 7-day recovery period (B) and presented in figure 3.

CTRL: controls; FR: food restricted; EXE: exercise; ABA: activity-based anorexia.

| A                  | Ventral Hippocampus |  | Two-way ANOVA                        |         |
|--------------------|---------------------|--|--------------------------------------|---------|
|                    | Acute phase         |  | (followed by Tuckey's post hoc test) |         |
| <i>mRNA levels</i> |                     |  | F value                              | p value |
| <b>Socs3</b>       | Interaction         |  | F (1, 16) = 34,09                    | <0,0001 |
|                    |                     |  |                                      |         |
| <b>Dnmt1</b>       | Interaction         |  | F (1, 16) = 6,684                    | 0,0199  |
|                    | Food restriction    |  | F (1, 16) =7,130                     | 0,0168  |

  

| B                  | Ventral Hippocampus |  | Two-way ANOVA                        |         |
|--------------------|---------------------|--|--------------------------------------|---------|
|                    | After recovery      |  | (followed by Tuckey's post hoc test) |         |
| <i>mRNA levels</i> |                     |  | F value                              | p value |
| <b>Socs3</b>       | Interaction         |  | F (1, 15) = 8,868                    | 0,0094  |
|                    | Exercise            |  | F (1, 15) = 7,637                    | 0,0145  |
|                    | Food restriction    |  | F (1, 15) =9,230                     | 0,0083  |
| <b>Dnmt1</b>       | Interaction         |  | F (1, 16) = 15,65                    | 0,0011  |
|                    | Exercise            |  | F (1, 16) = 61,23                    | <0,0001 |
|                    | Food restriction    |  | F (1, 16) = 32,03                    | <0,0001 |

**Supplementary Table S6.** Detailed F values, degrees of freedom and p values relative to two-way ANOVA analysis of protein levels evaluated in the dorsal Hippocampus of CTRL, FR, EXE and ABA rats in the acute phase of the phenotype (A) and after a 7-day recovery period (B) and presented in figure 4 and 5 and table 2.

CTRL: controls; FR: food restricted; EXE: exercise; ABA: activity-based anorexia.

A

| Dorsal Hippocampus                      |                  | Two-way ANOVA                        |         |
|-----------------------------------------|------------------|--------------------------------------|---------|
| Acute phase                             |                  | (followed by Tuckey's post hoc test) |         |
| <i>Post-synaptic density</i>            |                  | F value                              | p value |
| Leptin Receptor                         | Interaction      | F (1, 16) = 17,83                    | 0,0006  |
|                                         | Food restriction | F (1, 16) = 11,76                    | 0,0034  |
| <i>Cytosolic fraction</i>               |                  |                                      |         |
| pJAK2 (Tyr1007/1008)                    | Interaction      | F (1, 16) = 19,39                    | 0,0004  |
| JAK2                                    | Food restriction | F (1, 16) = 4,753                    | 0,0445  |
| pJAK2/JAK2                              | Interaction      | F (1, 16) = 4,621                    | 0,0472  |
| pSTAT3 (Tyr705)                         | Interaction      | F (1, 16) = 5,169                    | 0,0371  |
|                                         | Exercise         | F (1, 16) = 9,348                    | 0,0075  |
|                                         | Food restriction | F (1, 16) = 8,837                    | 0,0090  |
| STAT3                                   | Exercise         | F (1, 16) = 12,36                    | 0,0029  |
|                                         | Food restriction | F (1, 16) = 7,951                    | 0,0123  |
| <i>Nuclear fraction</i>                 |                  |                                      |         |
| STAT3                                   | Interaction      | F (1, 16) = 6,689                    | 0,0199  |
|                                         | Exercise         | F (1, 16) = 8,556                    | 0,0099  |
|                                         | Food restriction | F (1, 16) = 9,928                    | 0,0062  |
| <i>Cytosol to Nucleus translocation</i> |                  |                                      |         |
| STAT3                                   | Interaction      | F (1, 16) = 11,10                    | 0,0042  |
|                                         | Food restriction | F (1, 16) = 32,11                    | <0,0001 |

B

| After recovery                          |                  |                   |         |
|-----------------------------------------|------------------|-------------------|---------|
| <i>Post-synaptic density</i>            |                  |                   |         |
| Leptin Receptor                         | Interaction      | F (1, 16) = 17,28 | 0,0007  |
|                                         | Exercise         | F (1, 16) = 12,85 | 0,0025  |
|                                         | Food restriction | F (1, 16) = 62,88 | <0,0001 |
| <i>Cytosolic fraction</i>               |                  |                   |         |
| pJAK2 (Tyr1007/1008)                    | Interaction      | F (1, 16) = 10,13 | 0,0058  |
|                                         | Exercise         | F (1, 16) = 4,919 | 0,0414  |
| pJAK2/JAK2                              | Interaction      | F (1, 16) = 31,00 | <0,0001 |
|                                         | Food restriction | F (1, 16) = 23,10 | 0,0002  |
| <i>Nuclear fraction</i>                 |                  |                   |         |
| STAT3                                   | Interaction      | F (1, 16) = 8,651 | 0,0096  |
|                                         | Food restriction | F (1, 16) = 13,00 | 0,0024  |
| <i>Cytosol to Nucleus translocation</i> |                  |                   |         |
| STAT3                                   | Interaction      | F (1, 16) = 20,55 | 0,0003  |
|                                         | Food restriction | F (1, 16) = 19,82 | 0,0004  |

**Supplementary Table S7.** Detailed F values, degrees of freedom and p values relative to two-way ANOVA analysis of mRNA levels evaluated in the dorsal Hippocampus of CTRL, FR, EXE and ABA rats in the acute phase of the phenotype (A) and after a 7-day recovery period (B) and presented in figure 5.

CTRL: controls; FR: food restricted; EXE: exercise; ABA: activity-based anorexia.

| A | Dorsal Hippocampus |             | Two-way ANOVA                        |         |
|---|--------------------|-------------|--------------------------------------|---------|
|   | Acute phase        |             | (followed by Tuckey's post hoc test) |         |
|   | <i>mRNA levels</i> |             | F value                              | p value |
|   | <i>Socs3</i>       | Exercise    | F (1, 16) = 8,331                    | 0,0507  |
|   | <i>Dnmt1</i>       | Interaction | F (1, 16) = 23,28                    | 0,0002  |
|   |                    | Exercise    | F (1, 16) = 6,126                    | 0,0249  |

| B | Dorsal Hippocampus |                  | Two-way ANOVA                        |         |
|---|--------------------|------------------|--------------------------------------|---------|
|   | After recovery     |                  | (followed by Tuckey's post hoc test) |         |
|   | <i>mRNA levels</i> |                  | F value                              | p value |
|   | <i>Socs3</i>       | Exercise         | F (1, 16) = 42,43                    | <0,0001 |
|   | <i>Dnmt1</i>       | Interaction      | F (1, 16) = 14,34                    | 0,0016  |
|   |                    | Exercise         | F (1, 16) = 15,92                    | 0,0011  |
|   |                    | Food restriction | F (1, 16) = 23,36                    | 0,0002  |
